# Supplementary material for: Arginine Depletion Therapy with ADI-PEG20 Limits Tumor Growth in Argininosuccinate Synthase–Deficient Ovarian Cancer, Including Small-Cell Carcinoma of the Ovary, Hypercalcemic Type
Source: Oxford University Press journal article supplement (doi:10.1158/1078-0432.ccr-19-1905), 2020-05-14
Supplement: 10780432ccr191905-sup-223848_3_supp_6272087_q9njn3.pdf [file 10780432ccr191905-sup-223848_3_supp_6272087_q9njn3.pdf]

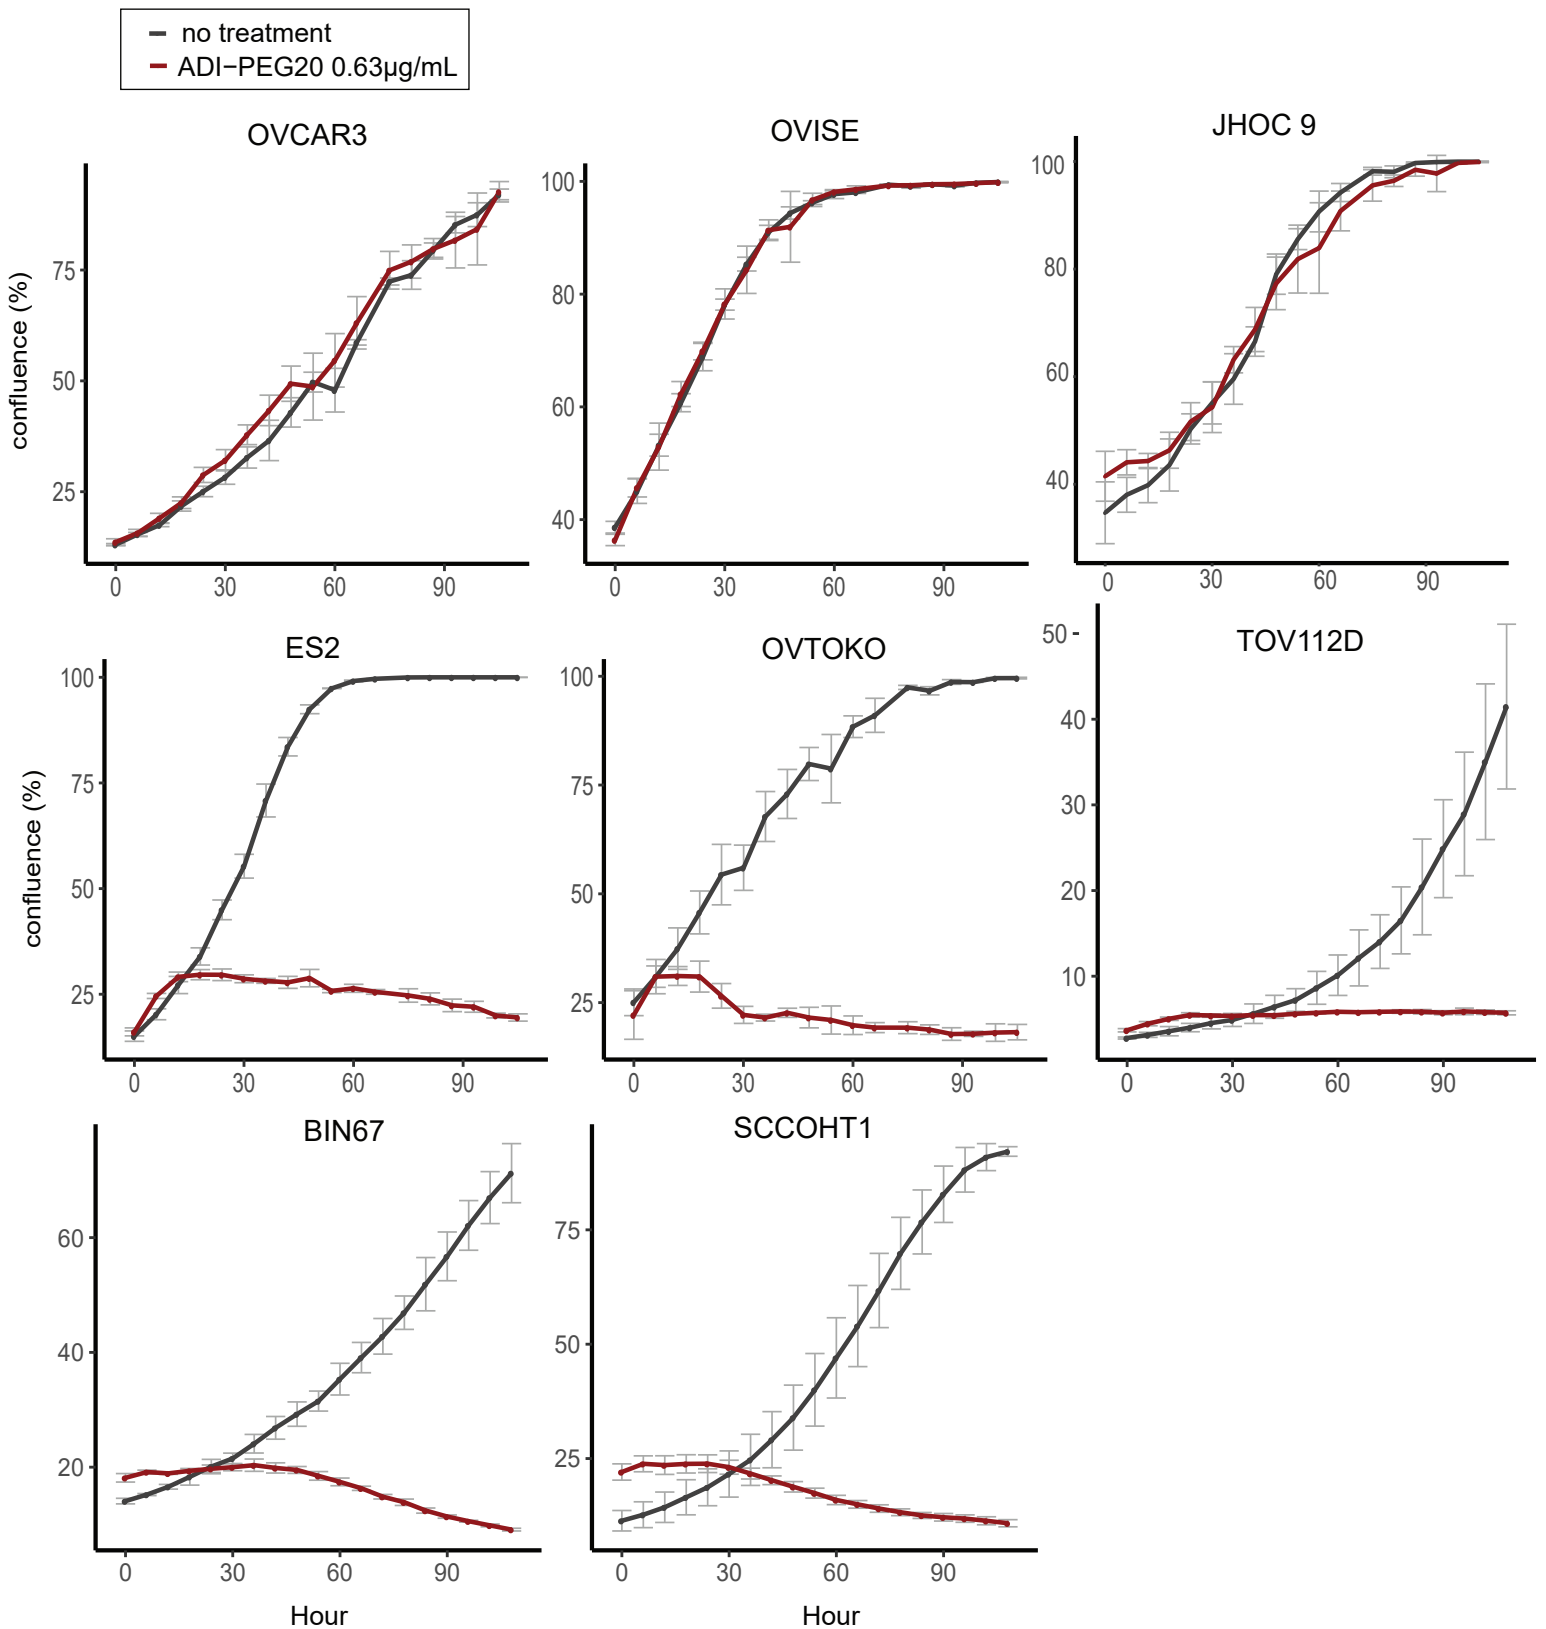

**Figure S5.** ADI-PEG20 efficacy in an extended panel of ovarian cancer cell lines. Cells were treated with 0.63 µg/mL ADI-PEG20. First row represents ASS1 expressing cell lines, whereas the rest of the cells are ASS1 deficient, therefore sensitive to ADI-PEG20 treatment. OVCAR3: HGSC cell line; JHOC 9, OVTOKO: CCOC cell lines. BIN67, SCCOHT1: SCCOHT cell lines; OVISE and ES2 represent atypical CCOC/ENOC based on molecular characterizations; TOV112D: de-differentiated ovarian cancer cell line. Error bars represent standard error of mean.
